# Supplementary material for: Cyclic mechanical stretch contributes to network development of osteocyte-like cells with morphological change and autophagy promotion but without preferential cell alignment in rat
Source: PubMed Central journal article supplement — Biochem Biophys Rep. 2017 May 11;11:191–7. doi: 10.1016/j.bbrep.2017.04.018 (PMC5614680; doi:10.1016/j.bbrep.2017.04.018), 2017-05-11
Supplement: mmc1.pdf [file mmc1.pdf]

**Conflict of Interest**

The authors declare no conflict of interest.
